# Supplementary material for: Photodynamic therapy in the therapy for recurrent/persistent nasopharyngeal cancer
Source: Springer Nature journal article supplement (doi:10.1186/1758-3284-1-40), 2009-12-01
Supplement: Additional file 1 [file 1758-3284-1-40-s1.doc]

**Additional file 1: Overall Treatment Results**
